# Supplementary material
Source: Springer Nature journal article supplement (https://www.springermedizin.de/resource/supplementary/13058_2010_9525_MOESM4_ESM.pdf/9702292)

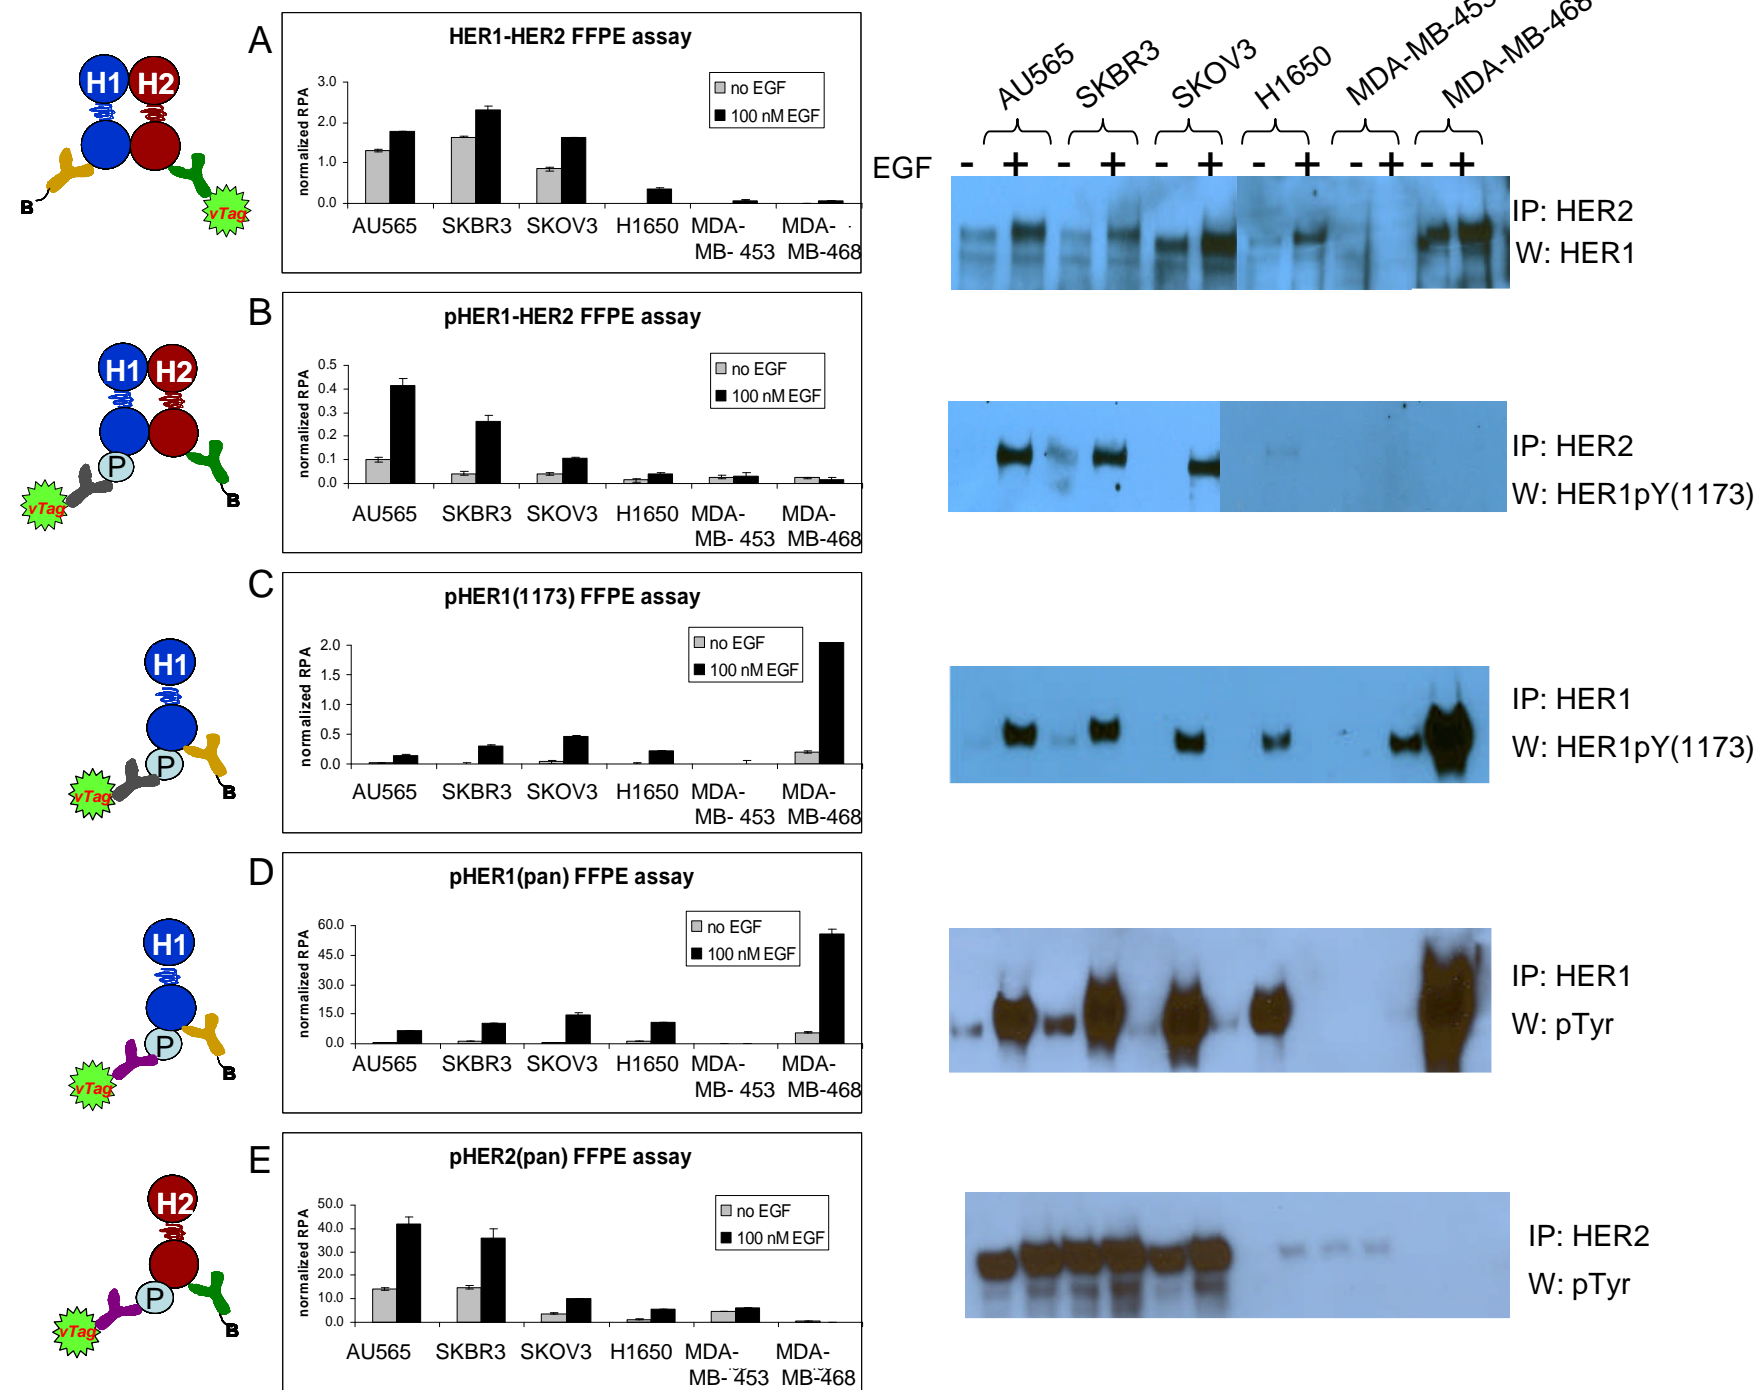

Supplement: MOESM4 [file 9702292]
